# Supplementary material
Source: PubMed Central journal article supplement (PMC4361218)
Supplement: Supp_Fig1.pdf [file Supp_Fig1.pdf]

## Supplementary Data

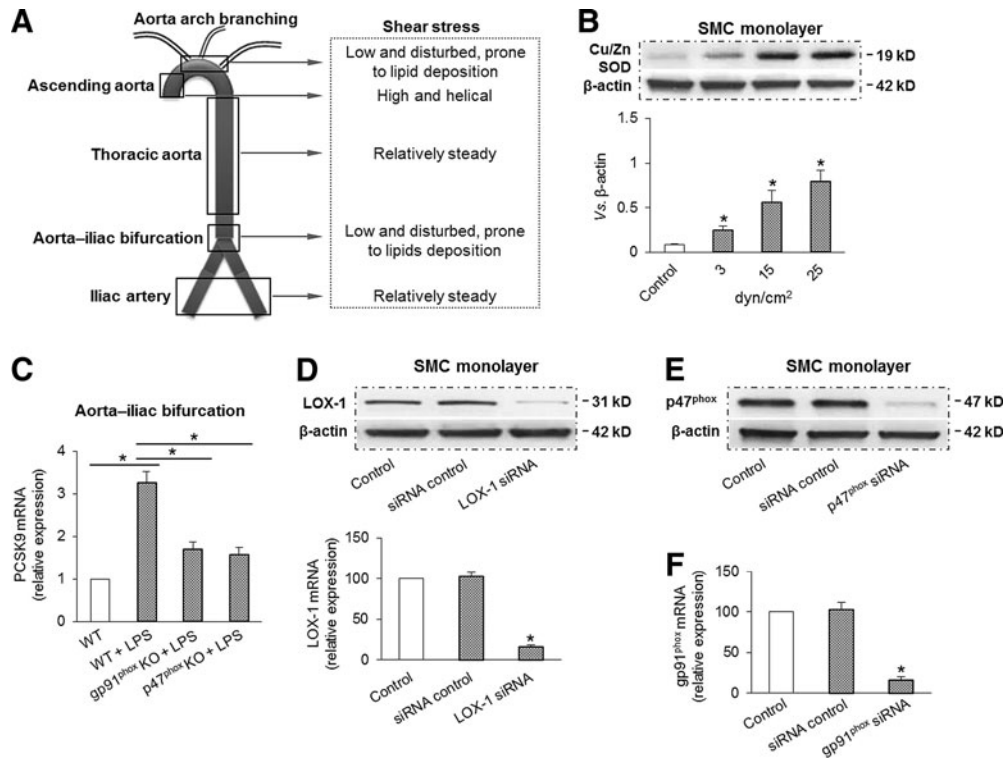

**SUPPLEMENTARY FIG. S1. Effect of shear stress on Cu/Zn SOD expression, PCSK9 expression at aorta-iliac bifurcation and confirmation of siRNA transfection efficiency.** (A) Patterns of shear stress along the aorta. (B) Increasing shear stress upregulated Cu/Zn SOD expression in SMCs. (C) q-PCR analysis for PCSK9 mRNA at aorta-iliac bifurcation. LPS administration markedly enhanced PCSK9 mRNA in the WT mice, but not in p47<sup>phox</sup> and gp91<sup>phox</sup> KO mice. Each aorta-iliac bifurcation region was measured in duplicate using 3 mice in each group ( $n=3$ ). (D) Both Western blot and q-PCR confirmed that LOX-1 siRNA transfection significantly inhibited LOX-1 expression in SMCs. (E) Western blot analysis showed that p47<sup>phox</sup> siRNA transfection markedly inhibited p47<sup>phox</sup> expression in SMCs. (F) q-PCR analysis showed that gp91<sup>phox</sup> siRNA transfection markedly inhibited gp91<sup>phox</sup> expression in SMCs. SMCs were exposed to 15 dynes/cm<sup>2</sup> of shear stress. Bar graphs represent data in mean  $\pm$  SD based on three to five independent experiments, \* $p < 0.05$ . LOX-1, lectin-like oxidized low-density lipoprotein receptor-1; LPS, lipopolysaccharide; KO, knockout; PCSK9, proprotein convertase subtilisin/kexin type 9; q-PCR, quantitative real-time PCR; SMCs, smooth muscle cells; SOD, superoxide dismutase.
