# Supplementary material
Source: PubMed Central journal article supplement (PMC4361218)
Supplement: Supp_Fig2.pdf [file Supp_Fig2.pdf]

Normal human aorta

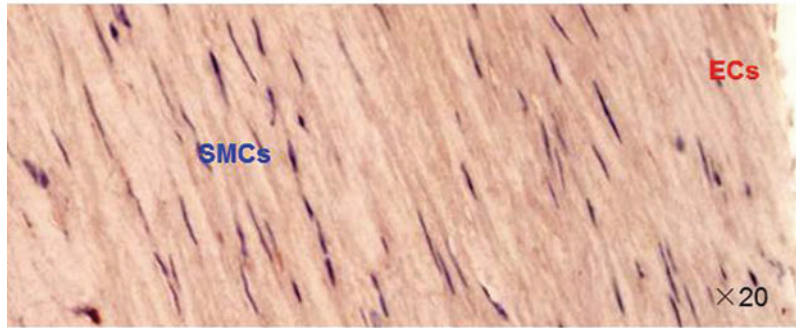

Atherosclerotic human aorta

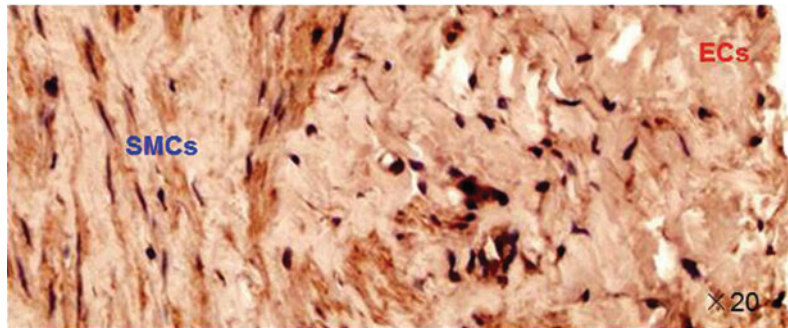

**SUPPLEMENTARY FIG. S2. Immunohistochemical staining for PCSK9 in normal and atherosclerotic human arterial sections.** Note that the SMCs in atherosclerotic plaque show intense staining for PCSK9.
